# Supplementary material
Source: PubMed Central journal article supplement (PMC4365977)
Supplement: NIHMS669979-supplement-supplement_1.pdf [file NIHMS669979-supplement-supplement_1.pdf]

### Supplemental Table 1

#### Primers used for site-directed mutagenesis

|      | Sequence (5'-3')                                    |
|------|-----------------------------------------------------|
| G30R | GATCCATTGCTGAAATG <u>AGGG</u> CCTTATGTCAGCTTG       |
| A31T | CCATTGCTGAAATGGGG <u>ACT</u> TATGTCAGCTTGCTG        |
| M44K | ATTGAAGGCA <u>AG</u> ATTCTTCTT                      |
| L50P | CTTAGTGA <u>CCA</u> TCCAGAAGG                       |
| S51A | AGTGAATTAG <u>CC</u> CAGAAGGCGT                     |
| S51D | AGTGAATTAG <u>AC</u> CAGAAGGCGT                     |
| K79D | GACAAAGAA <u>GAT</u> GGATATATT                      |
| Y81D | GAAAAAGGAG <u>AT</u> ATTGATTG                       |
| D83A | CAAAGAAAAAGGATATATT <u>GCT</u> TTGTCAAAAAGAAGAGTTTC |

The mutated residues are shaded and mutant codons are underlined.
